# Supplementary material
Source: Springer Nature journal article supplement (https://www.springermedizin.de/resource/supplementary/12985_2007_297_MOESM6_ESM.pdf/9607734)
Supplement: MOESM6 [file 9607734]

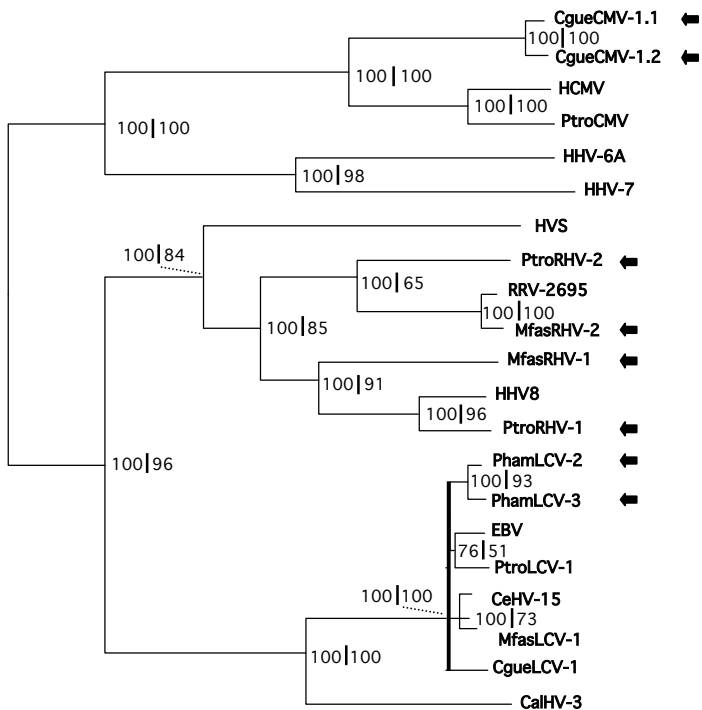

*Betaherpesvirinae*  
Genus *Cytomegalovirus*

*Betaherpesvirinae*  
Genus *Roseolovirus*

*Gammapherpesvirinae*  
Genus *Rhadinovirus*

*Gammapherpesvirinae*  
Genus *Lymphocryptovirus*
